# Supplementary material for: Enhancement of visible light photocatalytic performances of Bi2MoS2O4 nanoplates
Source: Royal Society of Chemistry journal article supplement (doi:10.1039/c3cy20853b), 2013-01-01
Supplement: c3cy20853b.pdf [file c3cy20853b.pdf]

**Supporting Information Available**

# Enhancement of Visible Light Photocatalysis Performances of $\text{Bi}_2\text{MoS}_2\text{O}_4$ Nanoplates

Rui Shi<sup>a, b</sup>, Tongguang Xu<sup>b</sup>, Lihong Yan<sup>b</sup>, Yongfa Zhu<sup>a, \*</sup>, Jun Zhou<sup>b, \*</sup>

<sup>a</sup> Department of Chemistry, Tsinghua University, Beijing, 100084, China

<sup>b</sup> Beijing Cigarette Factory, Beijing 101121, China

Fig. S1. XRD pattern of  $\text{Bi}_2\text{MoS}_2\text{O}_4$  crystallines

Fig. S2. Changes in TOC under visible light irradiation ( $\lambda > 420$  nm) by  $\text{Bi}_2\text{MoS}_2\text{O}_4$

Fig. S3. Evaluation of durability of  $\text{Bi}_2\text{MoS}_2\text{O}_4$  photooxidation from the repeatable bleaching of MB under visible-light irradiation ( $\lambda > 420$  nm)

Fig. S4. XRD patterns of  $\text{Bi}_2\text{MoS}_2\text{O}_4$  before and after MB bleaching: (a) before reaction and (b) after fifth run for the repeatable bleaching of MB

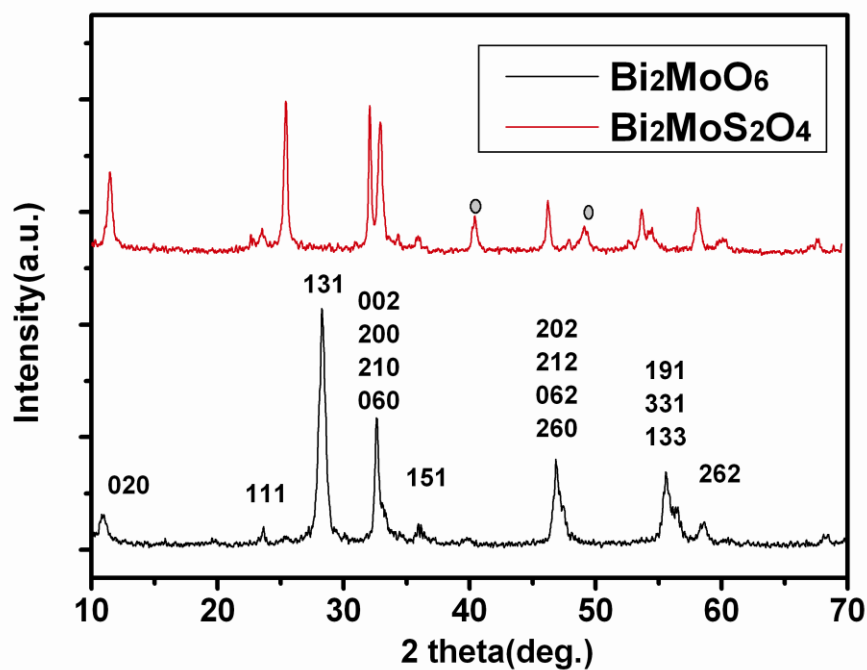

Fig. S1. XRD pattern of Bi<sub>2</sub>MoS<sub>2</sub>O<sub>4</sub> crystallines

Supporting Information Fig. S1 showed the XRD patterns of Bi<sub>2</sub>MoO<sub>6</sub> and Bi<sub>2</sub>MoS<sub>2</sub>O<sub>4</sub>. Comparing with Bi<sub>2</sub>MoO<sub>6</sub>, it can be seen that most of diffraction peaks of Bi<sub>2</sub>MoS<sub>2</sub>O<sub>4</sub> were shifted to a lower-angle side. The shift was reasonable because the ion radii of S<sup>2-</sup> was larger than that of O<sup>2-</sup>. The black sign means two new faces develop in the crystal structure of Bi<sub>2</sub>MoS<sub>2</sub>O<sub>4</sub>. It is believed that different surrounding growth conditions between Bi<sub>2</sub>MoO<sub>6</sub> and Bi<sub>2</sub>MoS<sub>2</sub>O<sub>4</sub> resulted in different growth rates of the faces. Hence, there were two new faces in XRD patterns of Bi<sub>2</sub>MoS<sub>2</sub>O<sub>4</sub>

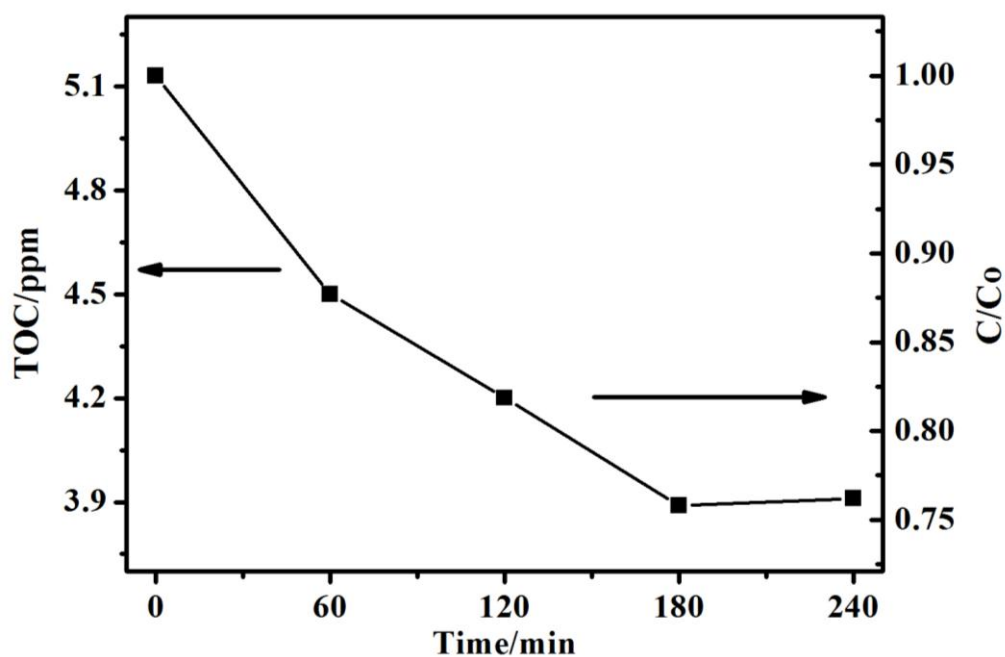

Fig. S2. Changes in TOC under visible light irradiation ( $\lambda > 420$  nm) by  $\text{Bi}_2\text{MoS}_2\text{O}_4$ .

The decrease of TOC in the photodegradation of MB by was shown in Fig. S2. The rate of TOC reduction was slower than that of the degradation of the MB, which suggests that the cleavage of the conjugated chromophore ring of MB resulting in the intermediates occurs during the photocatalytic process. The result confirmed that the MB degradation was inherently the result of a photocatalytic reaction, not only bleaching process.

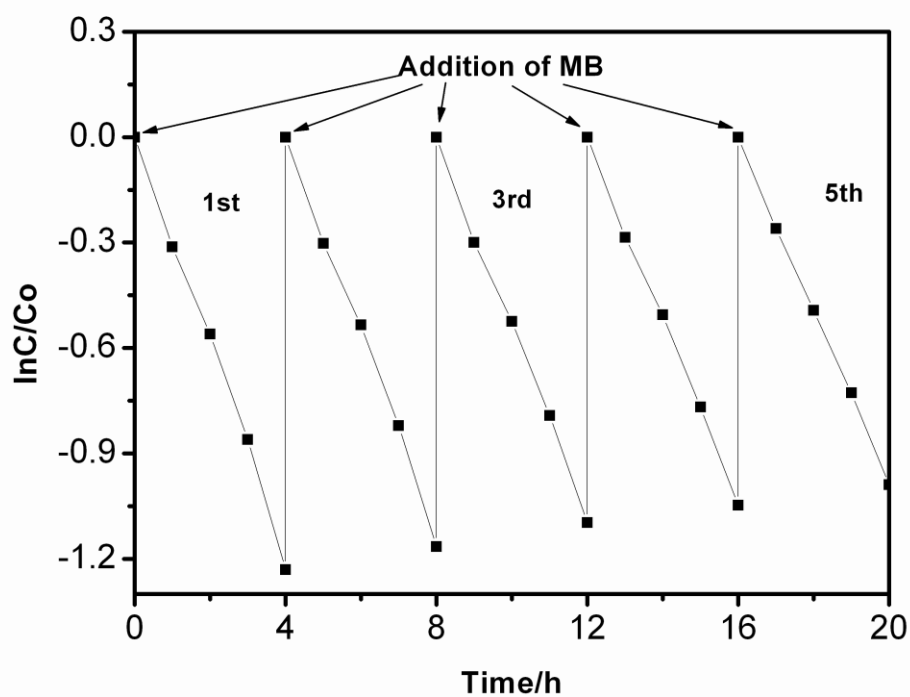

Fig. S3 Evaluation of durability of  $\text{Bi}_2\text{MoS}_2\text{O}_4$  photooxidation from the repeatable bleaching of MB under visible-light irradiation ( $\lambda > 420\text{nm}$ )

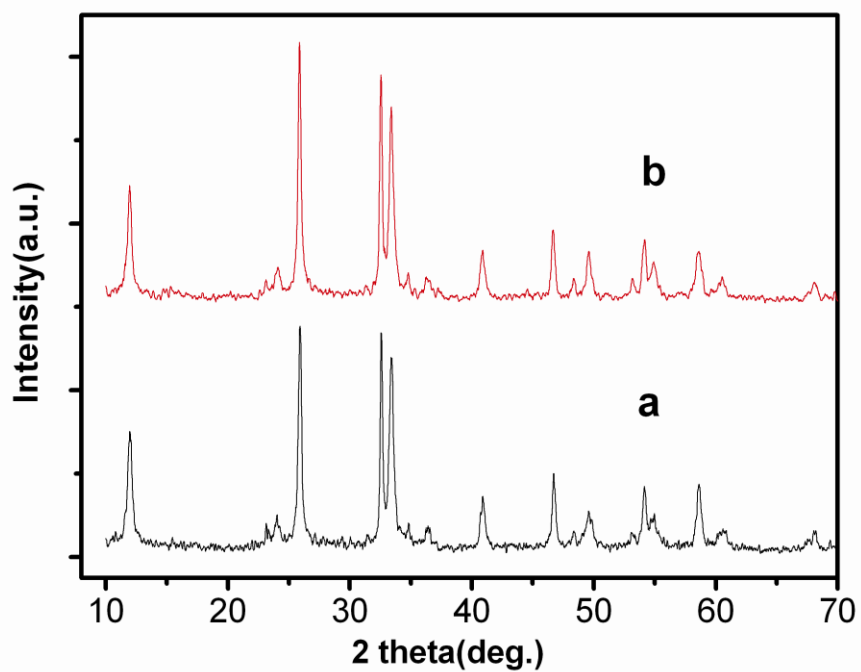

Fig. S4. XRD patterns of  $\text{Bi}_2\text{MoS}_2\text{O}_4$  before and after MB bleaching: (a) before reaction and (b) after fifth run for the repeatable bleaching of MB
